# Supplementary material
Source: publisher figshare collection journal article supplement (https://gsajournals.figshare.com/ndownloader/files/13184108)
Supplement: Supplementary file 1 [file 13184108]

## Sheet: Legend to Table S1
Table S1. Information about the NGS data used in this study
(a) Metadata of the NGS data downloaded from SRA
(b) Metadata of the NGS data of the Thünen Institute of Forest Genetics

## Sheet: Table S1a
Run Accession	Experiment Accession	Project Accession	Sample Accession	Submission Accession	BioProject	BioSample	Center	Center Project	Design	Read length	Study Title	Library Name	Library Strategy	Library Source	Library Selection	Scientific Name	Common Name	Description	Instrument	PubMed	Isolate	Age	Geographic Location	Tissue	Variety	Cultivar	Source Name	Drought Sensitivity	Developemental Stage	Sample Name	Biomaterial Provider	Individual
SRR6003833	SRX3159115	SRP116769	SRS2490438	SRA605257	PRJNA393495	SAMN07604232	Lanzhou University	Populus alba var. pyramidalis	Standard Illumina PE rnaseq protocol.	2x150 bp	Populus alba var. pyramidalis Transcriptome or Gene expression		RNA-Seq	TRANSCRIPTOMIC	cDNA	Populus alba			Illumina HiSeq 2500		Populus alba var. pyramidalis	2 years old	China: Xinjiang	leaf, phloem, xylem and root
SRR6003834	SRX3159115	SRP116769	SRS2490438	SRA605257	PRJNA393495	SAMN07604232	Lanzhou University	Populus alba var. pyramidalis	Standard Illumina PE rnaseq protocol.	2x150 bp	Populus alba var. pyramidalis Transcriptome or Gene expression		RNA-Seq	TRANSCRIPTOMIC	cDNA	Populus alba			Illumina HiSeq 2500		Populus alba var. pyramidalis	2 years old	China: Xinjiang	leaf, phloem, xylem and root
SRR6003835	SRX3159115	SRP116769	SRS2490438	SRA605257	PRJNA393495	SAMN07604232	Lanzhou University	Populus alba var. pyramidalis	Standard Illumina PE rnaseq protocol.	2x150 bp	Populus alba var. pyramidalis Transcriptome or Gene expression		RNA-Seq	TRANSCRIPTOMIC	cDNA	Populus alba			Illumina HiSeq 2500		Populus alba var. pyramidalis	2 years old	China: Xinjiang	leaf, phloem, xylem and root
SRR6003836	SRX3159115	SRP116769	SRS2490438	SRA605257	PRJNA393495	SAMN07604232	Lanzhou University	Populus alba var. pyramidalis	Standard Illumina PE rnaseq protocol.	2x150 bp	Populus alba var. pyramidalis Transcriptome or Gene expression		RNA-Seq	TRANSCRIPTOMIC	cDNA	Populus alba			Illumina HiSeq 2500		Populus alba var. pyramidalis	2 years old	China: Xinjiang	leaf, phloem, xylem and root
SRR5480821	SRX2764379	SRP105196	SRS2148833	SRA557031	PRJNA384196	SAMN06830299	NCBI	GSE98170	Standard Illumina PE rnaseq protocol.	2x101 bp	Drought stress-mediated transcriptome profile in Populus davidiana (cv. Junguk6-2)		RNA-Seq	TRANSCRIPTOMIC	cDNA	Populus davidiana			Illumina HiSeq 2500					leaf		Junguk6-2	Leaf	sensitive	Seedling
SRR5480822	SRX2764380	SRP105196	SRS2148834	SRA557031	PRJNA384196	SAMN06830298	NCBI	GSE98170	Standard Illumina PE rnaseq protocol.	2x101 bp	Drought stress-mediated transcriptome profile in Populus davidiana (cv. Junguk6-2)		RNA-Seq	TRANSCRIPTOMIC	cDNA	Populus davidiana			Illumina HiSeq 2500					leaf		Junguk6-2	Leaf	sensitive	Seedling
SRR5480823	SRX2764381	SRP105196	SRS2148835	SRA557031	PRJNA384196	SAMN06830303	NCBI	GSE98170	Standard Illumina PE rnaseq protocol.	2x101 bp	Drought stress-mediated transcriptome profile in Populus davidiana (cv. Junguk6-2)		RNA-Seq	TRANSCRIPTOMIC	cDNA	Populus davidiana			Illumina HiSeq 2500					leaf		Junguk6-2	Leaf	sensitive	Seedling
SRR5480824	SRX2764382	SRP105196	SRS2148836	SRA557031	PRJNA384196	SAMN06830302	NCBI	GSE98170	Standard Illumina PE rnaseq protocol.	2x101 bp	Drought stress-mediated transcriptome profile in Populus davidiana (cv. Junguk6-2)		RNA-Seq	TRANSCRIPTOMIC	cDNA	Populus davidiana			Illumina HiSeq 2500					leaf		Junguk6-2	Leaf	sensitive	Seedling
SRR5480825	SRX2764384	SRP105196	SRS2148838	SRA557031	PRJNA384196	SAMN06830301	NCBI	GSE98170	Standard Illumina PE rnaseq protocol.	2x101 bp	Drought stress-mediated transcriptome profile in Populus davidiana (cv. Junguk6-2)		RNA-Seq	TRANSCRIPTOMIC	cDNA	Populus davidiana			Illumina HiSeq 2500					leaf		Junguk6-2	Leaf	sensitive	Seedling
SRR5480826	SRX2764385	SRP105196	SRS2148839	SRA557031	PRJNA384196	SAMN06830300	NCBI	GSE98170	Standard Illumina PE rnaseq protocol.	2x101 bp	Drought stress-mediated transcriptome profile in Populus davidiana (cv. Junguk6-2)		RNA-Seq	TRANSCRIPTOMIC	cDNA	Populus davidiana			Illumina HiSeq 2500					leaf		Junguk6-2	Leaf	sensitive	Seedling
SRR5480760	SRX2764319	SRP105193	SRS2148781	SRA557028	PRJNA384197	SAMN06830294	NCBI	GSE98171	Standard Illumina PE rnaseq protocol.	2x101 bp	Drought stress-mediated transcriptome profile in Populus davidiana (cv. Odae19)		RNA-Seq	TRANSCRIPTOMIC	cDNA	Populus davidiana			Illumina HiSeq 2500					leaf		Odae19	Leaf	tolerant	Seedling
SRR5480761	SRX2764320	SRP105193	SRS2148782	SRA557028	PRJNA384197	SAMN06830293	NCBI	GSE98171	Standard Illumina PE rnaseq protocol.	2x101 bp	Drought stress-mediated transcriptome profile in Populus davidiana (cv. Odae19)		RNA-Seq	TRANSCRIPTOMIC	cDNA	Populus davidiana			Illumina HiSeq 2500					leaf		Odae19	Leaf	tolerant	Seedling
SRR5480762	SRX2764321	SRP105193	SRS2148783	SRA557028	PRJNA384197	SAMN06830292	NCBI	GSE98171	Standard Illumina PE rnaseq protocol.	2x101 bp	Drought stress-mediated transcriptome profile in Populus davidiana (cv. Odae19)		RNA-Seq	TRANSCRIPTOMIC	cDNA	Populus davidiana			Illumina HiSeq 2500					leaf		Odae19	Leaf	tolerant	Seedling
SRR5480763	SRX2764322	SRP105193	SRS2148784	SRA557028	PRJNA384197	SAMN06830291	NCBI	GSE98171	Standard Illumina PE rnaseq protocol.	2x101 bp	Drought stress-mediated transcriptome profile in Populus davidiana (cv. Odae19)		RNA-Seq	TRANSCRIPTOMIC	cDNA	Populus davidiana			Illumina HiSeq 2500					leaf		Odae19	Leaf	tolerant	Seedling
SRR5480764	SRX2764323	SRP105193	SRS2148785	SRA557028	PRJNA384197	SAMN06830290	NCBI	GSE98171	Standard Illumina PE rnaseq protocol.	2x101 bp	Drought stress-mediated transcriptome profile in Populus davidiana (cv. Odae19)		RNA-Seq	TRANSCRIPTOMIC	cDNA	Populus davidiana			Illumina HiSeq 2500					leaf		Odae19	Leaf	tolerant	Seedling
SRR5480765	SRX2764324	SRP105193	SRS2148786	SRA557028	PRJNA384197	SAMN06830289	NCBI	GSE98171	Standard Illumina PE rnaseq protocol.	2x101 bp	Drought stress-mediated transcriptome profile in Populus davidiana (cv. Odae19)		RNA-Seq	TRANSCRIPTOMIC	cDNA	Populus davidiana			Illumina HiSeq 2500					leaf		Odae19	Leaf	tolerant	Seedling
SRR5480754	SRX2764313	SRP105192	SRS2148775	SRA557027	PRJNA384198	SAMN06830286	NCBI	GSE98172	Standard Illumina PE rnaseq protocol.	2x101 bp	Drought stress-mediated transcriptome profile in Populus davidiana (cv. Palgong1)		RNA-Seq	TRANSCRIPTOMIC	cDNA	Populus davidiana			Illumina HiSeq 2500					leaf		Palgong1	Leaf	sensitive	Seedling
SRR5480755	SRX2764314	SRP105192	SRS2148776	SRA557027	PRJNA384198	SAMN06830297	NCBI	GSE98172	Standard Illumina PE rnaseq protocol.	2x101 bp	Drought stress-mediated transcriptome profile in Populus davidiana (cv. Palgong1)		RNA-Seq	TRANSCRIPTOMIC	cDNA	Populus davidiana			Illumina HiSeq 2500					leaf		Palgong1	Leaf	sensitive	Seedling
SRR5480756	SRX2764315	SRP105192	SRS2148777	SRA557027	PRJNA384198	SAMN06830296	NCBI	GSE98172	Standard Illumina PE rnaseq protocol.	2x101 bp	Drought stress-mediated transcriptome profile in Populus davidiana (cv. Palgong1)		RNA-Seq	TRANSCRIPTOMIC	cDNA	Populus davidiana			Illumina HiSeq 2500					leaf		Palgong1	Leaf	sensitive	Seedling
SRR5480757	SRX2764316	SRP105192	SRS2148778	SRA557027	PRJNA384198	SAMN06830295	NCBI	GSE98172	Standard Illumina PE rnaseq protocol.	2x101 bp	Drought stress-mediated transcriptome profile in Populus davidiana (cv. Palgong1)		RNA-Seq	TRANSCRIPTOMIC	cDNA	Populus davidiana			Illumina HiSeq 2500					leaf		Palgong1	Leaf	sensitive	Seedling
SRR5480758	SRX2764317	SRP105192	SRS2148779	SRA557027	PRJNA384198	SAMN06830288	NCBI	GSE98172	Standard Illumina PE rnaseq protocol.	2x101 bp	Drought stress-mediated transcriptome profile in Populus davidiana (cv. Palgong1)		RNA-Seq	TRANSCRIPTOMIC	cDNA	Populus davidiana			Illumina HiSeq 2500					leaf		Palgong1	Leaf	sensitive	Seedling
SRR5480759	SRX2764318	SRP105192	SRS2148780	SRA557027	PRJNA384198	SAMN06830287	NCBI	GSE98172	Standard Illumina PE rnaseq protocol.	2x101 bp	Drought stress-mediated transcriptome profile in Populus davidiana (cv. Palgong1)		RNA-Seq	TRANSCRIPTOMIC	cDNA	Populus davidiana			Illumina HiSeq 2500					leaf		Palgong1	Leaf	sensitive	Seedling
SRR5480748	SRX2764307	SRP105191	SRS2148769	SRA557026	PRJNA384199	SAMN06829908	NCBI	GSE98173	Standard Illumina PE rnaseq protocol.	2x101 bp	Drought stress-mediated transcriptome profile in Populus davidiana (cv. Palgong2)		RNA-Seq	TRANSCRIPTOMIC	cDNA	Populus davidiana			Illumina HiSeq 2500					leaf		Palgong2	Leaf	tolerant	Seedling
SRR5480749	SRX2764308	SRP105191	SRS2148770	SRA557026	PRJNA384199	SAMN06829907	NCBI	GSE98173	Standard Illumina PE rnaseq protocol.	2x101 bp	Drought stress-mediated transcriptome profile in Populus davidiana (cv. Palgong2)		RNA-Seq	TRANSCRIPTOMIC	cDNA	Populus davidiana			Illumina HiSeq 2500					leaf		Palgong2	Leaf	tolerant	Seedling
SRR5480750	SRX2764309	SRP105191	SRS2148771	SRA557026	PRJNA384199	SAMN06829906	NCBI	GSE98173	Standard Illumina PE rnaseq protocol.	2x101 bp	Drought stress-mediated transcriptome profile in Populus davidiana (cv. Palgong2)		RNA-Seq	TRANSCRIPTOMIC	cDNA	Populus davidiana			Illumina HiSeq 2500					leaf		Palgong2	Leaf	tolerant	Seedling
SRR5480751	SRX2764310	SRP105191	SRS2148772	SRA557026	PRJNA384199	SAMN06829905	NCBI	GSE98173	Standard Illumina PE rnaseq protocol.	2x101 bp	Drought stress-mediated transcriptome profile in Populus davidiana (cv. Palgong2)		RNA-Seq	TRANSCRIPTOMIC	cDNA	Populus davidiana			Illumina HiSeq 2500					leaf		Palgong2	Leaf	tolerant	Seedling
SRR5480752	SRX2764311	SRP105191	SRS2148773	SRA557026	PRJNA384199	SAMN06829904	NCBI	GSE98173	Standard Illumina PE rnaseq protocol.	2x101 bp	Drought stress-mediated transcriptome profile in Populus davidiana (cv. Palgong2)		RNA-Seq	TRANSCRIPTOMIC	cDNA	Populus davidiana			Illumina HiSeq 2500					leaf		Palgong2	Leaf	tolerant	Seedling
SRR5480753	SRX2764312	SRP105191	SRS2148774	SRA557026	PRJNA384199	SAMN06829903	NCBI	GSE98173	Standard Illumina PE rnaseq protocol.	2x101 bp	Drought stress-mediated transcriptome profile in Populus davidiana (cv. Palgong2)		RNA-Seq	TRANSCRIPTOMIC	cDNA	Populus davidiana			Illumina HiSeq 2500					leaf		Palgong2	Leaf	tolerant	Seedling
SRR5480067	SRX2763893	SRP105187	SRS2148457	SRA557019	PRJNA384193	SAMN06829881	NCBI	GSE98174	Standard Illumina PE rnaseq protocol.	2x101 bp	Drought stress-mediated transcriptome profile in Populus davidiana (cv. Seogwang15)		RNA-Seq	TRANSCRIPTOMIC	cDNA	Populus davidiana			Illumina HiSeq 2500					leaf		Seogwang15	Leaf	sensitive	Seedling
SRR5480068	SRX2763894	SRP105187	SRS2148461	SRA557019	PRJNA384193	SAMN06829880	NCBI	GSE98174	Standard Illumina PE rnaseq protocol.	2x101 bp	Drought stress-mediated transcriptome profile in Populus davidiana (cv. Seogwang15)		RNA-Seq	TRANSCRIPTOMIC	cDNA	Populus davidiana			Illumina HiSeq 2500					leaf		Seogwang15	Leaf	sensitive	Seedling
SRR5480069	SRX2763895	SRP105187	SRS2148459	SRA557019	PRJNA384193	SAMN06829885	NCBI	GSE98174	Standard Illumina PE rnaseq protocol.	2x101 bp	Drought stress-mediated transcriptome profile in Populus davidiana (cv. Seogwang15)		RNA-Seq	TRANSCRIPTOMIC	cDNA	Populus davidiana			Illumina HiSeq 2500					leaf		Seogwang15	Leaf	sensitive	Seedling
SRR5480070	SRX2763896	SRP105187	SRS2148458	SRA557019	PRJNA384193	SAMN06829884	NCBI	GSE98174	Standard Illumina PE rnaseq protocol.	2x101 bp	Drought stress-mediated transcriptome profile in Populus davidiana (cv. Seogwang15)		RNA-Seq	TRANSCRIPTOMIC	cDNA	Populus davidiana			Illumina HiSeq 2500					leaf		Seogwang15	Leaf	sensitive	Seedling
SRR5480071	SRX2763897	SRP105187	SRS2148463	SRA557019	PRJNA384193	SAMN06829883	NCBI	GSE98174	Standard Illumina PE rnaseq protocol.	2x101 bp	Drought stress-mediated transcriptome profile in Populus davidiana (cv. Seogwang15)		RNA-Seq	TRANSCRIPTOMIC	cDNA	Populus davidiana			Illumina HiSeq 2500					leaf		Seogwang15	Leaf	sensitive	Seedling
SRR5480072	SRX2763898	SRP105187	SRS2148462	SRA557019	PRJNA384193	SAMN06829882	NCBI	GSE98174	Standard Illumina PE rnaseq protocol.	2x101 bp	Drought stress-mediated transcriptome profile in Populus davidiana (cv. Seogwang15)		RNA-Seq	TRANSCRIPTOMIC	cDNA	Populus davidiana			Illumina HiSeq 2500					leaf		Seogwang15	Leaf	sensitive	Seedling
SRR5480031	SRX2763857	SRP105186	SRS2148422	SRA557018	PRJNA384191	SAMN06829873	NCBI	GSE98175	Standard Illumina PE rnaseq protocol.	2x101 bp	Drought stress-mediated transcriptome profile in Populus davidiana (cv. Seogwang9)		RNA-Seq	TRANSCRIPTOMIC	cDNA	Populus davidiana			Illumina HiSeq 2500					leaf		Seogwang9	Leaf	tolerant	Seedling
SRR5480032	SRX2763858	SRP105186	SRS2148421	SRA557018	PRJNA384191	SAMN06829872	NCBI	GSE98175	Standard Illumina PE rnaseq protocol.	2x101 bp	Drought stress-mediated transcriptome profile in Populus davidiana (cv. Seogwang9)		RNA-Seq	TRANSCRIPTOMIC	cDNA	Populus davidiana			Illumina HiSeq 2500					leaf		Seogwang9	Leaf	tolerant	Seedling
SRR5480033	SRX2763859	SRP105186	SRS2148423	SRA557018	PRJNA384191	SAMN06829871	NCBI	GSE98175	Standard Illumina PE rnaseq protocol.	2x101 bp	Drought stress-mediated transcriptome profile in Populus davidiana (cv. Seogwang9)		RNA-Seq	TRANSCRIPTOMIC	cDNA	Populus davidiana			Illumina HiSeq 2500					leaf		Seogwang9	Leaf	tolerant	Seedling
SRR5480034	SRX2763860	SRP105186	SRS2148425	SRA557018	PRJNA384191	SAMN06829870	NCBI	GSE98175	Standard Illumina PE rnaseq protocol.	2x101 bp	Drought stress-mediated transcriptome profile in Populus davidiana (cv. Seogwang9)		RNA-Seq	TRANSCRIPTOMIC	cDNA	Populus davidiana			Illumina HiSeq 2500					leaf		Seogwang9	Leaf	tolerant	Seedling
SRR5480035	SRX2763861	SRP105186	SRS2148431	SRA557018	PRJNA384191	SAMN06829869	NCBI	GSE98175	Standard Illumina PE rnaseq protocol.	2x101 bp	Drought stress-mediated transcriptome profile in Populus davidiana (cv. Seogwang9)		RNA-Seq	TRANSCRIPTOMIC	cDNA	Populus davidiana			Illumina HiSeq 2500					leaf		Seogwang9	Leaf	tolerant	Seedling
SRR5480036	SRX2763862	SRP105186	SRS2148427	SRA557018	PRJNA384191	SAMN06829868	NCBI	GSE98175	Standard Illumina PE rnaseq protocol.	2x101 bp	Drought stress-mediated transcriptome profile in Populus davidiana (cv. Seogwang9)		RNA-Seq	TRANSCRIPTOMIC	cDNA	Populus davidiana			Illumina HiSeq 2500					leaf		Seogwang9	Leaf	tolerant	Seedling
ERR380498	ERX352875	ERP004398	ERS374199	ERA269242	PRJEB5040	SAMEA2266730	UPSC		Standard Illumina PE rnaseq protocol.	2x101 bp	UPSC Populus tremula expression catalog	Populus tremula Non-girdled Twigs	RNA-Seq	TRANSCRIPTOMIC	RANDOM	Populus tremula		Populus tremula Non-girdled Twigs sampled from the Asp201 tree growing on the SLU Campus in Umea in northern Sweden	Illumina HiSeq 2000							Asp201				ERS374199
ERR380500	ERX352877	ERP004398	ERS374201	ERA269242	PRJEB5040	SAMEA2266732	UPSC		Standard Illumina PE rnaseq protocol.	2x101 bp	UPSC Populus tremula expression catalog	Populus tremula Drought Leaves	RNA-Seq	TRANSCRIPTOMIC	RANDOM	Populus tremula		Populus tremula Drought Leaves sampled from plants propagated in the SLU Greenhouse from root cuttings of the Asp201 tree located on the SLU Campus	Illumina HiSeq 2000							Asp201				ERS374201
ERR380501	ERX352878	ERP004398	ERS374202	ERA269242	PRJEB5040	SAMEA2266733	UPSC		Standard Illumina PE rnaseq protocol.	2x101 bp	UPSC Populus tremula expression catalog	Populus tremula Expanded Flowers	RNA-Seq	TRANSCRIPTOMIC	RANDOM	Populus tremula		Populus tremula Expanded Flowers sampled from the Asp201 tree growing on the SLU Campus in Umea in northern Sweden	Illumina HiSeq 2000							Asp201				ERS374202
ERR380502	ERX352879	ERP004398	ERS374203	ERA269242	PRJEB5040	SAMEA2266734	UPSC		Standard Illumina PE rnaseq protocol.	2x101 bp	UPSC Populus tremula expression catalog	Populus tremula Beetle-damaged Leaves	RNA-Seq	TRANSCRIPTOMIC	RANDOM	Populus tremula		Populus tremula Beetle-damaged Leaves sampled from plants propagated in the SLU Greenhouse from root cuttings of the Asp201 tree located on the SLU Campus	Illumina HiSeq 2000							Asp201				ERS374203
ERR380503	ERX352880	ERP004398	ERS374204	ERA269242	PRJEB5040	SAMEA2266735	UPSC		Standard Illumina PE rnaseq protocol.	2x101 bp	UPSC Populus tremula expression catalog	Populus tremula Mechanically-damaged Leaves	RNA-Seq	TRANSCRIPTOMIC	RANDOM	Populus tremula		Populus tremula Mechanically-damaged Leaves sampled from plants propagated in the SLU Greenhouse from root cuttings of the Asp201 tree located on the SLU Campus	Illumina HiSeq 2000							Asp201				ERS374204
ERR380504	ERX352881	ERP004398	ERS374205	ERA269242	PRJEB5040	SAMEA2266736	UPSC		Standard Illumina PE rnaseq protocol.	2x101 bp	UPSC Populus tremula expression catalog	Populus tremula Mature Leaves	RNA-Seq	TRANSCRIPTOMIC	RANDOM	Populus tremula		Populus tremula Mature Leaves sampled from the Asp201 tree growing on the SLU Campus in Umea in northern Sweden	Illumina HiSeq 2000							Asp201				ERS374205
ERR380505	ERX352882	ERP004398	ERS374206	ERA269242	PRJEB5040	SAMEA2266737	UPSC		Standard Illumina PE rnaseq protocol.	2x101 bp	UPSC Populus tremula expression catalog	Populus tremula Mature Leaves	RNA-Seq	TRANSCRIPTOMIC	RANDOM	Populus tremula		Populus tremula Mature Leaves sampled from the Asp201 tree growing on the SLU Campus in Umea in northern Sweden	Illumina HiSeq 2000							Asp201				ERS374206
ERR380506	ERX352883	ERP004398	ERS374207	ERA269242	PRJEB5040	SAMEA2266738	UPSC		Standard Illumina PE rnaseq protocol.	2x101 bp	UPSC Populus tremula expression catalog	Populus tremula Expanding Flowers	RNA-Seq	TRANSCRIPTOMIC	RANDOM	Populus tremula		Populus tremula Expanding Flowers sampled from the Asp201 tree growing on the SLU Campus in Umea in northern Sweden	Illumina HiSeq 2000							Asp201				ERS374207
ERR380507	ERX352884	ERP004398	ERS374208	ERA269242	PRJEB5040	SAMEA2266739	UPSC		Standard Illumina PE rnaseq protocol.	2x101 bp	UPSC Populus tremula expression catalog	Populus tremula Whole Suckers	RNA-Seq	TRANSCRIPTOMIC	RANDOM	Populus tremula		Populus tremula Whole Suckers sampled from the Asp201 tree growing on the SLU Campus in Umea in northern Sweden	Illumina HiSeq 2000							Asp201				ERS374208
ERR380508	ERX352885	ERP004398	ERS374209	ERA269242	PRJEB5040	SAMEA2266740	UPSC		Standard Illumina PE rnaseq protocol.	2x101 bp	UPSC Populus tremula expression catalog	Populus tremula Mature Petiole	RNA-Seq	TRANSCRIPTOMIC	RANDOM	Populus tremula		Populus tremula Mature Petiole sampled from the Asp201 tree growing on the SLU Campus in Umea in northern Sweden	Illumina HiSeq 2000							Asp201				ERS374209
ERR380509	ERX352886	ERP004398	ERS374210	ERA269242	PRJEB5040	SAMEA2266741	UPSC		Standard Illumina PE rnaseq protocol.	2x101 bp	UPSC Populus tremula expression catalog	Populus tremula Undamaged Leaves	RNA-Seq	TRANSCRIPTOMIC	RANDOM	Populus tremula		Populus tremula Undamaged Leaves sampled from plants propagated in the SLU Greenhouse from root cuttings of the Asp201 tree located on the SLU Campus	Illumina HiSeq 2000							Asp201				ERS374210
ERR380510	ERX352887	ERP004398	ERS374211	ERA269242	PRJEB5040	SAMEA2266742	UPSC		Standard Illumina PE rnaseq protocol.	2x101 bp	UPSC Populus tremula expression catalog	Populus tremula Pre-chilling Buds	RNA-Seq	TRANSCRIPTOMIC	RANDOM	Populus tremula		Populus tremula Pre-chilling Buds sampled from the Asp201 tree growing on the SLU Campus in Umea in northern Sweden	Illumina HiSeq 2000							Asp201				ERS374211
ERR380511	ERX352888	ERP004398	ERS374212	ERA269242	PRJEB5040	SAMEA2266743	UPSC		Standard Illumina PE rnaseq protocol.	2x101 bp	UPSC Populus tremula expression catalog	Populus tremula Dormant Buds	RNA-Seq	TRANSCRIPTOMIC	RANDOM	Populus tremula		Populus tremula Dormant Buds sampled from the Asp201 tree growing on the SLU Campus in Umea in northern Sweden	Illumina HiSeq 2000							Asp201				ERS374212
ERR380512	ERX352889	ERP004398	ERS374213	ERA269242	PRJEB5040	SAMEA2266744	UPSC		Standard Illumina PE rnaseq protocol.	2x101 bp	UPSC Populus tremula expression catalog	Populus tremula Drought Leaves	RNA-Seq	TRANSCRIPTOMIC	RANDOM	Populus tremula		Populus tremula Drought Leaves sampled from plants propagated in the SLU Greenhouse from root cuttings of the Asp201 tree located on the SLU Campus	Illumina HiSeq 2000							Asp201				ERS374213
ERR380513	ERX352890	ERP004398	ERS374214	ERA269242	PRJEB5040	SAMEA2266745	UPSC		Standard Illumina PE rnaseq protocol.	2x101 bp	UPSC Populus tremula expression catalog	Populus tremula Freshly-expanded Leaves	RNA-Seq	TRANSCRIPTOMIC	RANDOM	Populus tremula		Populus tremula Freshly-expanded Leaves sampled from the Asp201 tree growing on the SLU Campus in Umea in northern Sweden	Illumina HiSeq 2000							Asp201				ERS374214
ERR380514	ERX352891	ERP004398	ERS374215	ERA269242	PRJEB5040	SAMEA2266746	UPSC		Standard Illumina PE rnaseq protocol.	2x101 bp	UPSC Populus tremula expression catalog	Populus tremula Non-girdled Leaves	RNA-Seq	TRANSCRIPTOMIC	RANDOM	Populus tremula		Populus tremula Non-girdled Leaves sampled from the Asp201 tree growing on the SLU Campus in Umea in northern Sweden	Illumina HiSeq 2000							Asp201				ERS374215
ERR380515	ERX352892	ERP004398	ERS374216	ERA269242	PRJEB5040	SAMEA2266747	UPSC		Standard Illumina PE rnaseq protocol.	2x101 bp	UPSC Populus tremula expression catalog	Populus tremula Control Roots	RNA-Seq	TRANSCRIPTOMIC	RANDOM	Populus tremula		Populus tremula Control Roots sampled from plants propagated in the SLU Greenhouse from root cuttings of the Asp201 tree located on the SLU Campus	Illumina HiSeq 2000							Asp201				ERS374216
ERR380516	ERX352893	ERP004398	ERS374217	ERA269242	PRJEB5040	SAMEA2266748	UPSC		Standard Illumina PE rnaseq protocol.	2x101 bp	UPSC Populus tremula expression catalog	Populus tremula Girdled Leaves	RNA-Seq	TRANSCRIPTOMIC	RANDOM	Populus tremula		Populus tremula Girdled Leaves sampled from the Asp201 tree growing on the SLU Campus in Umea in northern Sweden	Illumina HiSeq 2000							Asp201				ERS374217
ERR380517	ERX352894	ERP004398	ERS374218	ERA269242	PRJEB5040	SAMEA2266749	UPSC		Standard Illumina PE rnaseq protocol.	2x101 bp	UPSC Populus tremula expression catalog	Populus tremula Mature Seeds	RNA-Seq	TRANSCRIPTOMIC	RANDOM	Populus tremula		Populus tremula Mature Seeds sampled from the Asp201 tree growing on the SLU Campus in Umea in northern Sweden	Illumina HiSeq 2000							Asp201				ERS374218
ERR380518	ERX352895	ERP004398	ERS374219	ERA269242	PRJEB5040	SAMEA2266750	UPSC		Standard Illumina PE rnaseq protocol.	2x101 bp	UPSC Populus tremula expression catalog	Populus tremula Expanding Leaves	RNA-Seq	TRANSCRIPTOMIC	RANDOM	Populus tremula		Populus tremula Expanding Leaves sampled from the Asp201 tree growing on the SLU Campus in Umea in northern Sweden	Illumina HiSeq 2000							Asp201				ERS374219
ERR380519	ERX352896	ERP004398	ERS374220	ERA269242	PRJEB5040	SAMEA2266751	UPSC		Standard Illumina PE rnaseq protocol.	2x101 bp	UPSC Populus tremula expression catalog	Populus tremula Control Leaves	RNA-Seq	TRANSCRIPTOMIC	RANDOM	Populus tremula		Populus tremula Control Leaves sampled from plants propagated in the SLU Greenhouse from root cuttings of the Asp201 tree located on the SLU Campus	Illumina HiSeq 2000							Asp201				ERS374220
ERR380520	ERX352897	ERP004398	ERS374221	ERA269242	PRJEB5040	SAMEA2266752	UPSC		Standard Illumina PE rnaseq protocol.	2x101 bp	UPSC Populus tremula expression catalog	Populus tremula Cambium and Phloem	RNA-Seq	TRANSCRIPTOMIC	RANDOM	Populus tremula		Populus tremula Cambium and Phloem sampled from the Asp201 tree growing on the SLU Campus in Umea in northern Sweden	Illumina HiSeq 2000							Asp201				ERS374221
ERR380521	ERX352898	ERP004398	ERS374222	ERA269242	PRJEB5040	SAMEA2266753	UPSC		Standard Illumina PE rnaseq protocol.	2x101 bp	UPSC Populus tremula expression catalog	Populus tremula Drought Roots	RNA-Seq	TRANSCRIPTOMIC	RANDOM	Populus tremula		Populus tremula Drought Roots sampled from plants propagated in the SLU Greenhouse from root cuttings of the Asp201 tree located on the SLU Campus	Illumina HiSeq 2000							Asp201				ERS374222

## Sheet: Table S1b
Run Accession	Experiment Accession	Project Accession	Sample Accession	Submission Accession	BioProject	BioSample	Sample ID	Center	Center Project	Design	Read length	Study Title	Library Name	Library Strategy	Library Source	Library Selection	Scientific Name	Common Name	Description	Instrument	PubMed	Isolate	Age	Geographic Location	Tissue	Variety	Cultivar	Source Name	Drought Sensitivity	Developemental Stage	Sample Name	Biomaterial Provider	Individual
							NG-6861_W52_03_01__lib28220_1742_5_1	Thünen Institute of Forest Genetics		Standard Illumina SE rnaseq protocol.	101 bp	Flower bud development		RNA-Seq	TRANSCRIPTOMIC		Populus tremula			Illumina HiSeq 2000							W52
							NG-6861_W52_07_11__lib28217_1742_3_1	Thünen Institute of Forest Genetics		Standard Illumina SE rnaseq protocol.	101 bp	Flower bud development		RNA-Seq	TRANSCRIPTOMIC		Populus tremula			Illumina HiSeq 2000							W52
							NG-6861_W52_15_08__lib28214_1742_3_1	Thünen Institute of Forest Genetics		Standard Illumina SE rnaseq protocol.	101 bp	Flower bud development		RNA-Seq	TRANSCRIPTOMIC		Populus tremula			Illumina HiSeq 2000							W52
							NG-6861_W100_03_01__lib28221_1742_4_1	Thünen Institute of Forest Genetics		Standard Illumina SE rnaseq protocol.	101 bp	Flower bud development		RNA-Seq	TRANSCRIPTOMIC		Populus tremula			Illumina HiSeq 2000							W100
							NG-6861_W100_03_01__lib28221_1742_5_1	Thünen Institute of Forest Genetics		Standard Illumina SE rnaseq protocol.	101 bp	Flower bud development		RNA-Seq	TRANSCRIPTOMIC		Populus tremula			Illumina HiSeq 2000							W100
							NG-6861_W100_07_11__lib28218_1742_4_1	Thünen Institute of Forest Genetics		Standard Illumina SE rnaseq protocol.	101 bp	Flower bud development		RNA-Seq	TRANSCRIPTOMIC		Populus tremula			Illumina HiSeq 2000							W100
							NG-6861_W100_15_08__lib28215_1742_5_1	Thünen Institute of Forest Genetics		Standard Illumina SE rnaseq protocol.	101 bp	Flower bud development		RNA-Seq	TRANSCRIPTOMIC		Populus tremula			Illumina HiSeq 2000							W100
							NG-11380_Muhle_Larsen_C_lib160690_5170_7_1	Thünen Institute of Forest Genetics		Standard Illumina PE rnaseq protocol.	2x126 bp	FastWOOD - fast growing trees for biomass production		RNA-Seq	TRANSCRIPTOMIC		Populus trichocarpa		Populus trichocarpa undamaged control leaves sampled from plants propagated in a Greenhouse from stem cuttings	Illumina HiSeq 4000					Leaf		Muhle_Larsen			mature leaves
							NG-11380_Muhle_Larsen_C_lib160690_5170_7_2	Thünen Institute of Forest Genetics		Standard Illumina PE rnaseq protocol.	2x126 bp	FastWOOD - fast growing trees for biomass production		RNA-Seq	TRANSCRIPTOMIC		Populus trichocarpa		Populus trichocarpa undamaged control leaves sampled from plants propagated in a Greenhouse from stem cuttings	Illumina HiSeq 4000					Leaf		Muhle_Larsen			mature leaves
							NG-11380_Muhle_Larsen_D_lib160682_5170_1_1	Thünen Institute of Forest Genetics		Standard Illumina PE rnaseq protocol.	2x126 bp	FastWOOD - fast growing trees for biomass production		RNA-Seq	TRANSCRIPTOMIC		Populus trichocarpa		Populus trichocarpa beetle-damaged leaves sampled from plants propagated in a Greenhouse from stem cuttings	Illumina HiSeq 4000					Leaf		Muhle_Larsen			mature leaves
							NG-11380_Muhle_Larsen_D_lib160682_5170_1_2	Thünen Institute of Forest Genetics		Standard Illumina PE rnaseq protocol.	2x126 bp	FastWOOD - fast growing trees for biomass production		RNA-Seq	TRANSCRIPTOMIC		Populus trichocarpa		Populus trichocarpa beetle-damaged leaves sampled from plants propagated in a Greenhouse from stem cuttings	Illumina HiSeq 4000					Leaf		Muhle_Larsen			mature leaves
							NG-11380_NW7_17C_C_lib160689_5170_7_1	Thünen Institute of Forest Genetics		Standard Illumina PE rnaseq protocol.	2x126 bp	FastWOOD - fast growing trees for biomass production		RNA-Seq	TRANSCRIPTOMIC		Populus trichocarpa		Populus trichocarpa undamaged control leaves sampled from plants propagated in a Greenhouse from stem cuttings	Illumina HiSeq 4000					Leaf		NW7_17C			mature leaves
							NG-11380_NW7_17C_C_lib160689_5170_7_2	Thünen Institute of Forest Genetics		Standard Illumina PE rnaseq protocol.	2x126 bp	FastWOOD - fast growing trees for biomass production		RNA-Seq	TRANSCRIPTOMIC		Populus trichocarpa		Populus trichocarpa undamaged control leaves sampled from plants propagated in a Greenhouse from stem cuttings	Illumina HiSeq 4000					Leaf		NW7_17C			mature leaves
							NG-11380_NW7_17C_D_lib160681_5170_2_1	Thünen Institute of Forest Genetics		Standard Illumina PE rnaseq protocol.	2x126 bp	FastWOOD - fast growing trees for biomass production		RNA-Seq	TRANSCRIPTOMIC		Populus trichocarpa		Populus trichocarpa beetle-damaged leaves sampled from plants propagated in a Greenhouse from stem cuttings	Illumina HiSeq 4000					Leaf		NW7_17C			mature leaves
							NG-11380_NW7_17C_D_lib160681_5170_2_2	Thünen Institute of Forest Genetics		Standard Illumina PE rnaseq protocol.	2x126 bp	FastWOOD - fast growing trees for biomass production		RNA-Seq	TRANSCRIPTOMIC		Populus trichocarpa		Populus trichocarpa beetle-damaged leaves sampled from plants propagated in a Greenhouse from stem cuttings	Illumina HiSeq 4000					Leaf		NW7_17C			mature leaves
							NG-11380_NW7_17C_D_lib160681_5184_6_1	Thünen Institute of Forest Genetics		Standard Illumina PE rnaseq protocol.	2x126 bp	FastWOOD - fast growing trees for biomass production		RNA-Seq	TRANSCRIPTOMIC		Populus trichocarpa		Populus trichocarpa beetle-damaged leaves sampled from plants propagated in a Greenhouse from stem cuttings	Illumina HiSeq 4000					Leaf		NW7_17C			mature leaves
							NG-11380_NW7_17C_D_lib160681_5184_6_2	Thünen Institute of Forest Genetics		Standard Illumina PE rnaseq protocol.	2x126 bp	FastWOOD - fast growing trees for biomass production		RNA-Seq	TRANSCRIPTOMIC		Populus trichocarpa		Populus trichocarpa beetle-damaged leaves sampled from plants propagated in a Greenhouse from stem cuttings	Illumina HiSeq 4000					Leaf		NW7_17C			mature leaves
							NG-11380_Weser4_C_lib160687_5170_2_1	Thünen Institute of Forest Genetics		Standard Illumina PE rnaseq protocol.	2x126 bp	FastWOOD - fast growing trees for biomass production		RNA-Seq	TRANSCRIPTOMIC		Populus trichocarpa		Populus trichocarpa undamaged control leaves sampled from plants propagated in a Greenhouse from stem cuttings	Illumina HiSeq 4000					Leaf		Weser4			mature leaves
							NG-11380_Weser4_C_lib160687_5170_2_2	Thünen Institute of Forest Genetics		Standard Illumina PE rnaseq protocol.	2x126 bp	FastWOOD - fast growing trees for biomass production		RNA-Seq	TRANSCRIPTOMIC		Populus trichocarpa		Populus trichocarpa undamaged control leaves sampled from plants propagated in a Greenhouse from stem cuttings	Illumina HiSeq 4000					Leaf		Weser4			mature leaves
							NG-11380_Weser4_D_lib160679_5170_1_1	Thünen Institute of Forest Genetics		Standard Illumina PE rnaseq protocol.	2x126 bp	FastWOOD - fast growing trees for biomass production		RNA-Seq	TRANSCRIPTOMIC		Populus trichocarpa		Populus trichocarpa beetle-damaged leaves sampled from plants propagated in a Greenhouse from stem cuttings	Illumina HiSeq 4000					Leaf		Weser4			mature leaves
							NG-11380_Weser4_D_lib160679_5170_1_2	Thünen Institute of Forest Genetics		Standard Illumina PE rnaseq protocol.	2x126 bp	FastWOOD - fast growing trees for biomass production		RNA-Seq	TRANSCRIPTOMIC		Populus trichocarpa		Populus trichocarpa beetle-damaged leaves sampled from plants propagated in a Greenhouse from stem cuttings	Illumina HiSeq 4000					Leaf		Weser4			mature leaves
							NG-11380_Weser6_C_lib160688_5170_3_1	Thünen Institute of Forest Genetics		Standard Illumina PE rnaseq protocol.	2x126 bp	FastWOOD - fast growing trees for biomass production		RNA-Seq	TRANSCRIPTOMIC		Populus trichocarpa		Populus trichocarpa undamaged control leaves sampled from plants propagated in a Greenhouse from stem cuttings	Illumina HiSeq 4000					Leaf		Weser6			mature leaves
							NG-11380_Weser6_C_lib160688_5170_3_2	Thünen Institute of Forest Genetics		Standard Illumina PE rnaseq protocol.	2x126 bp	FastWOOD - fast growing trees for biomass production		RNA-Seq	TRANSCRIPTOMIC		Populus trichocarpa		Populus trichocarpa undamaged control leaves sampled from plants propagated in a Greenhouse from stem cuttings	Illumina HiSeq 4000					Leaf		Weser6			mature leaves
							NG-11380_Weser6_D_lib160680_5170_1_1	Thünen Institute of Forest Genetics		Standard Illumina PE rnaseq protocol.	2x126 bp	FastWOOD - fast growing trees for biomass production		RNA-Seq	TRANSCRIPTOMIC		Populus trichocarpa		Populus trichocarpa beetle-damaged leaves sampled from plants propagated in a Greenhouse from stem cuttings	Illumina HiSeq 4000					Leaf		Weser6			mature leaves
							NG-11380_Weser6_D_lib160680_5170_1_2	Thünen Institute of Forest Genetics		Standard Illumina PE rnaseq protocol.	2x126 bp	FastWOOD - fast growing trees for biomass production		RNA-Seq	TRANSCRIPTOMIC		Populus trichocarpa		Populus trichocarpa beetle-damaged leaves sampled from plants propagated in a Greenhouse from stem cuttings	Illumina HiSeq 4000					Leaf		Weser6			mature leaves
							NG-11380_Weser6_D_lib160680_5184_6_1	Thünen Institute of Forest Genetics		Standard Illumina PE rnaseq protocol.	2x126 bp	FastWOOD - fast growing trees for biomass production		RNA-Seq	TRANSCRIPTOMIC		Populus trichocarpa		Populus trichocarpa beetle-damaged leaves sampled from plants propagated in a Greenhouse from stem cuttings	Illumina HiSeq 4000					Leaf		Weser6			mature leaves
							NG-11380_Weser6_D_lib160680_5184_6_2	Thünen Institute of Forest Genetics		Standard Illumina PE rnaseq protocol.	2x126 bp	FastWOOD - fast growing trees for biomass production		RNA-Seq	TRANSCRIPTOMIC		Populus trichocarpa		Populus trichocarpa beetle-damaged leaves sampled from plants propagated in a Greenhouse from stem cuttings	Illumina HiSeq 4000					Leaf		Weser6			mature leaves
